# Supplementary material for: Foliar Application of Chelated Sugar Alcohol Calcium Improves Photosynthesis and Tuber Quality under Drought Stress in Potatoes (Solanum tuberosum L.)
Source: MDPI journal article supplement (doi:10.3390/ijms241512216), 2023-07-30
Supplement: s1 [file s1]

## Supplementary Figures

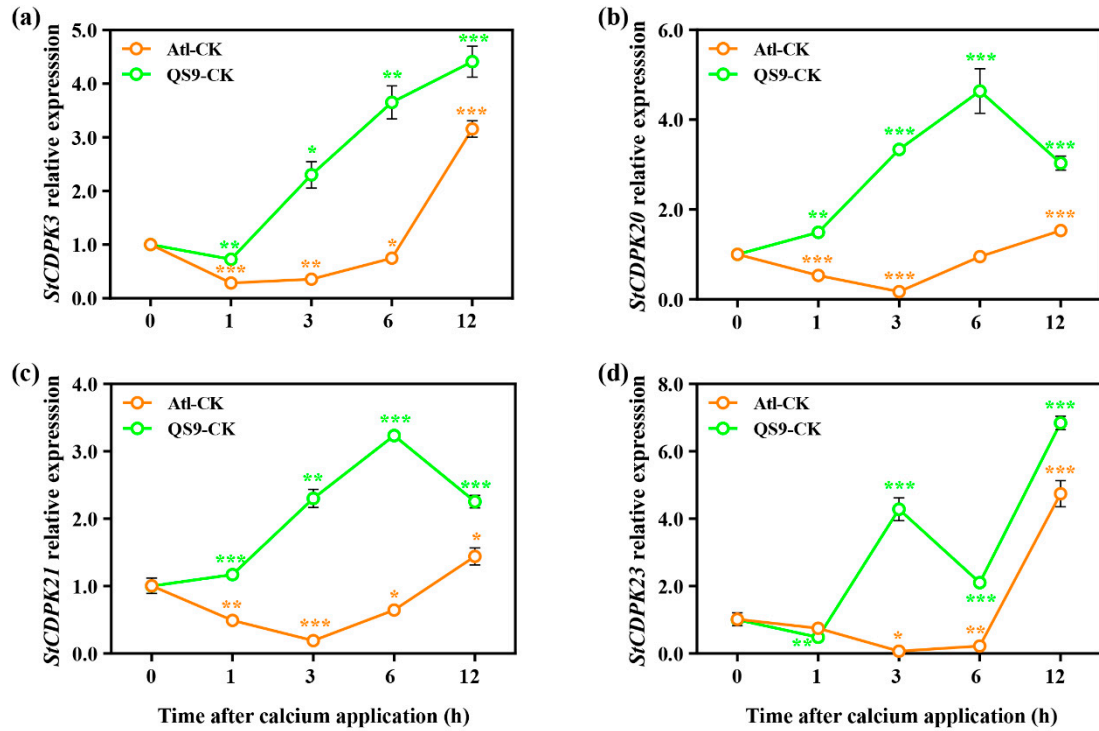

**Figure S1.** Effect of foliar application of  $\text{Ca}^{2+}$  on (a) *StCDPK3* (XM\_006366477.2); (b) *StCDPK20* (NM\_001318643.1); (c) *StCDPK21* (XM\_006351851.2) and (d) *StCDPK23* (XM\_015310592.1) of two potato cultivars ('Atlantic' and 'Qingshu 9') under normal conditions. 0 h is the control, a sample of untreated plants under normal conditions. Vertical bars indicate means  $\pm$  s.d. The expression level was assessed using the  $2^{-\Delta\Delta\text{Ct}}$  method, with *Actin* (XM\_015308091.1) as an internal reference gene. Student's *t*-test was performed to evaluate the significance between different time points and 0 h. \*,  $p < 0.05$ ; \*\*,  $p < 0.01$ ; and \*\*\*,  $p < 0.001$ .

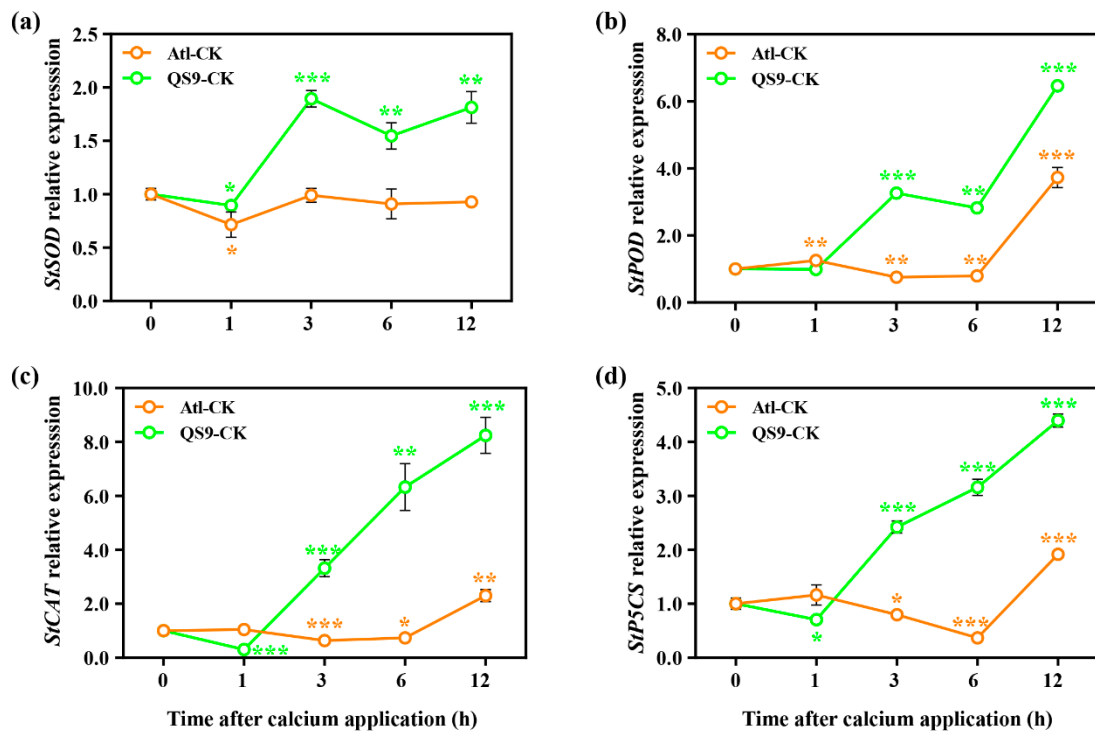

**Figure S2.** Effect of foliar application of  $\text{Ca}^{2+}$  on marker genes of physiological indicators (a) *StSOD* (XM\_006358693.2); (b) *StPOD* (XM\_006350817.2); (c) *StCAT* (NM\_001287934.1) and (d) *StP5CS* (XM\_006355200.2) of two potato cultivars ('Atlantic' and 'Qingshu 9') under normal condition. 0 h is the control, a sample of untreated plants under normal conditions. Vertical bars indicate means  $\pm$  s.d. The expression level was assessed using the  $2^{-\Delta\Delta\text{Ct}}$  method, with *Actin* (XM\_015308091.1) as an internal reference gene. Student's *t*-test was performed to evaluate the significance between different time points and 0 h. \*,  $p < 0.05$ ; \*\*,  $p < 0.01$ ; and \*\*\*,  $p < 0.001$ .
