# Supplementary material for: Foliar Application of Chelated Sugar Alcohol Calcium Improves Photosynthesis and Tuber Quality under Drought Stress in Potatoes (Solanum tuberosum L.)
Source: Int J Mol Sci. 2023 Jul 30;24(15):12216. doi: 10.3390/ijms241512216 (PMC10418820; doi:10.3390/ijms241512216)
Supplement: Supplementary file 1 [file ijms-24-12216-s001.zip]

Archive with 8 entries (8 files):
- Figure S1-2.pdf
- Table S1.xlsx
- Table S2.xlsx
- Table S3.xlsx
- Table S4.xlsx
- Table S5.xlsx
- Table S6.xlsx
- Table S7.xlsx
