# Supplementary material for: Foliar Application of Chelated Sugar Alcohol Calcium Improves Photosynthesis and Tuber Quality under Drought Stress in Potatoes (Solanum tuberosum L.)
Source: Int J Mol Sci. 2023 Jul 30;24(15):12216. doi: 10.3390/ijms241512216 (PMC10418820; doi:10.3390/ijms241512216)
Supplement: Supplementary file 1 [file ijms-24-12216-s001.zip › Table S1.xlsx]

## Sheet: Table S1
Table S1: Results of two-way analysis of variance (ANOVA) in two potato varieties. Numbers represent F values. Pt: Palisade tissue; St: Spongy tissue; Ue: upper epidermis; Le: lower epidermis; Rps: Ratio of palisade / spongy tissue thickness; CTR: organizational tightness; SR: tissue porosity; Pn: net photosynthetic rate, Gs: stomatal conductance, Tr: transpiration rate, WUEi: instantaneous water…
Dependent variable	Atlantic			Qingshu 9
	Independent variable			Independent variable
	Drought	Ca	Drought×Ca	Drought	Ca	Drought×Ca
Pt thickness	108.73 ***	31.58 ***	2.56 ns	87.31 ***	2.49 ns	0.39 ns
St thickness	15.18 **	23.85 ***	0.83 ns	39.02 ***	57.98 ***	5.96 *
Ue thickness	0.01 ns	4.44 ns	0.08 ns	0.36 ns	0.35 ns	0.74 ns
Le thickness	8.04 *	0.08 ns	2.04 ns	0.07 ns	0.41 ns	0.46 ns
Leaf thickness	159.41 ***	51.15 ***	2.31 ns	140.78 ***	83.19 ***	6.56 *
Rps	6.63 *	22.70 ***	0.29 ns	8.88 **	82.68 ***	7.61 *
CTR	3.49 ns	1.17 ns	1.00 ns	9.77 **	24.21 ***	2.98 ns
SR	2.73 ns	2.15 ns	1.22 ns	1.11 ns	17.06 **	4.63 *
SPAD chlorophyll	67.22 ***	70.65 ***	1.61 ns	0.55 ns	12.35 **	6.47 *
Pn	215.10 ***	124.87 ***	0.36 ns	175.00 ***	59.42 ***	0.09 ns
Gs	223.27 ***	49.38 ***	1.32 ns	127.61 ***	28.92 ***	0.24 ns
Tr	19.93 ***	7.50 *	0.84 ns	45.05 ***	5.89 *	1.88 ns
WUEi	54.69 ***	34.48 ***	0.34 ns	16.67 **	7.64 *	0.14 ns
MDA content	45.04 ***	580.09 ***	72.42 ***	138.23 ***	20.51 ***	26.64 ***
H2O2 content	1545.09 ***	239.68 ***	6.26 *	168.66 ***	95.95 ***	18.51 **
Pro content	174.25 ***	20.70 ***	6.91 *	7.11 *	324.95 ***	173.57 ***
Soluble sugar	269.96 ***	122.32 ***	81.60 ***	77.91 ***	34.50 ***	17.06 **
SOD activities	134.59 ***	13.61 **	2.45 ns	240.52 ***	252.80 ***	4.97 *
POD activities	26.90 ***	14.14 **	0.13 ns	191.38 ***	135.50 ***	25.42 ***
CAT activities	32.68 ***	18.89 **	13.47 **	7.49 *	0.06 ns	0.40 ns
