# Supplementary material for: Foliar Application of Chelated Sugar Alcohol Calcium Improves Photosynthesis and Tuber Quality under Drought Stress in Potatoes (Solanum tuberosum L.)
Source: Int J Mol Sci. 2023 Jul 30;24(15):12216. doi: 10.3390/ijms241512216 (PMC10418820; doi:10.3390/ijms241512216)
Supplement: Supplementary file 1 [file ijms-24-12216-s001.zip › Table S2.xlsx]

## Sheet: Table S2
Table S2: Leaf microscopic structure in potato leaves under drought stress and amended with Ca2+. DAD: days after start of drought; CK: normal watering treatment, maintain soil volumetric water content (θw) at 65-75%; D: drought treatment, maintian soil volumetric water content (θw) at 30-40% 30 days after sowing; Pt: Palisade tissue; St: Spongy tissue; Ue: upper epidermis; Le: lower epidermis; R…
	DAD	Atlantic				Qingshu 9
		CK	CK+Ca	D	D+Ca	CK	CK+Ca	D	D+Ca
Pt thickness (μm)	15	75.30 ± 3.58		87.25 ± 5.00 ***		68.47 ± 3.24		70.18 ± 3.83 ns
	30	73.15 ± 5.06 b	64.91 ± 4.56 c	87.86 ± 4.48 a	71.89 ± 3.27 b	49.06 ± 3.43 c	51.19 ± 5.63 c	65.90 ± 2.46 b	83.13 ± 2.55 a
	45	101.07 ± 7.93 b	89.32 ± 4.25 c	114.42 ± 6.51 a	115.89 ± 3.88 a	72.72 ± 2.97 bc	78.58 ± 3.80 a	75.81 ± 8.16 ab	68.27 ± 5.04 c
St thickness (μm)	15	99.72 ± 5.95		131.91 ± 9.66 ***		107.24 ± 6.15		101.68 ± 6.51 ns
	30	97.06 ± 8.70 c	80.08 ± 9.21 d	123.01 ± 4.76 a	105.85 ± 4.43 b	73.43 ± 4.79 b	75.62 ± 3.73 b	103.21 ± 7.12 a	98.92 ± 8.22 a
	45	130.72 ± 7.14 b	108.83 ± 9.29 c	144.84 ± 9.69 a	130.40 ± 11.90 b	108.20 ± 8.68 a	84.17 ± 6.27 b	109.38 ± 13.07 a	77.63 ± 4.25 b
Ue thickness (μm)	15	10.67 ± 4.32		18.11 ± 2.14 ***		16.73 ± 4.02		17.30 ± 2.35 ns
	30	15.80 ± 3.23 bc	17.70 ± 3.38 a	16.49 ± 3.69 bc	13.31 ± 4.24 c	17.94 ± 2.77 a	16.53 ± 3.59 a	15.81 ± 4.81 a	14.84 ± 4.18 a
	45	17.16 ± 4.45 a	14.49 ± 2.50 a	17.89 ± 7.03 a	17.10 ± 1.93 a	14.47 ± 3.37 a	14.58 ± 4.2 a	14.55 ± 3.27 a	17.45 ± 4.30 a
De thickness (μm)	15	5.39 ± 0.83		9.86 ± 2.07 ***		8.94 ± 2.79		7.57 ± 0.88 ns
	30	6.45 ± 1.09 c	7.18 ± 1.25 bc	10.12 ± 2.32 a	8.59 ± 2.54 ab	7.80 ± 0.76 ab	7.25 ± 1.10 bc	8.80 ± 2.42 a	5.96 ± 1.00 c
	45	7.83 ± 1.57 ab	8.24 ± 1.64 ab	9.86 ± 3.44 a	7.27 ± 1.91 b	9.63 ± 3.76 a	8.73 ± 2.60 a	8.39 ± 2.39 a	7.84 ± 2.22 a
Leaf thickness (μm)	15	187.84 ± 6.15		247.41±14.19 ***		200.12±5.03		194.71±4.45 *
	30	194.01 ± 7.72 b	168.43 ± 5.06 c	241.89 ± 8.89 a	198.54 ± 6.45 b	144.54 ± 2.39 b	148.09 ± 7.06 b	201.35 ± 5.54 a	204.26 ± 6.55 a
	45	246.76 ± 5.66 b	226.08 ± 3.30 c	283.28 ± 7.11 a	281.77 ± 6.20 a	208.58 ± 8.17 a	183.15 ± 5.74 b	203.23 ± 9.59 a	166.89 ± 5.23 c
Rps	15	0.76 ± 0.04		0.66 ± 0.04 ***		0.64 ± 0.03		0.69 ± 0.04 **
	30	0.75 ± 0.05 b	0.81 ± 0.06 a	0.71 ± 0.04 bc	0.68 ± 0.03 c	0.67 ± 0.05 b	0.68 ± 0.07 b	0.64 ± 0.02 b	0.84 ± 0.03 a
	45	0.77 ± 0.06 c	0.82 ± 0.04 b	0.79 ± 0.04 bc	0.89 ± 0.03 a	0.67 ± 0.03 c	0.93 ± 0.05 a	0.69 ± 0.07 c	0.88 ± 0.06 b
CTR	15	0.40 ± 0.02 a		0.35 ± 0.02 ***		0.34 ± 0.02		0.36 ± 0.02 *
	30	0.38 ± 0.03 ab	0.39 ± 0.03 a	0.36 ± 0.02 b	0.36 ± 0.02 b	0.34 ± 0.02 b	0.35 ± 0.04 b	0.33 ± 0.01 b	0.41 ± 0.01 a
	45	0.41 ± 0.03 a	0.40 ± 0.02 a	0.40 ± 0.02 a	0.41 ± 0.01 a	0.35 ± 0.01 b	0.43 ± 0.02 a	0.37 ± 0.04 b	0.41 ± 0.03 a
SR	15	0.53 ± 0.03 a		0.53 ± 0.04 ns		0.54 ± 0.03		0.52 ± 0.03 ns
	30	0.50 ± 0.04 ab	0.48 ± 0.05 b	0.51 ± 0.02 ab	0.53 ± 0.02 a	0.51 ± 0.03 a	0.51 ± 0.03 a	0.51 ± 0.04 a	0.48 ± 0.04 a
	45	0.53 ± 0.03 a	0.48 ± 0.04 bc	0.51 ± 0.03 ab	0.46 ± 0.04 c	0.52 ± 0.04 a	0.46 ± 0.03 b	0.54 ± 0.06 a	0.47 ± 0.03 b
