# Supplementary material for: Foliar Application of Chelated Sugar Alcohol Calcium Improves Photosynthesis and Tuber Quality under Drought Stress in Potatoes (Solanum tuberosum L.)
Source: Int J Mol Sci. 2023 Jul 30;24(15):12216. doi: 10.3390/ijms241512216 (PMC10418820; doi:10.3390/ijms241512216)
Supplement: Supplementary file 1 [file ijms-24-12216-s001.zip › Table S3.xlsx]

## Sheet: Table S3
Table S3: Standardized data of potato tuber quality indicators
Cultivar	Treatment	X1 (Moisture)	X2 (Protein)	X3 (Starch)	X4 (Ca)	X5 (Fiber)	X6 (Fe)	X7 (K)	X8 (Mg)	X9 (Reducing sugar)	X10 (Vc)
Atlantic	CK	-0.588835	-0.0799015	0.450714	0.8223	-0.207025	-0.537576	0.0146394	0.694609	-1.02006	-0.701937
	D	0.805861	0.772381	-2.0808	-0.288788	-1.18126	-1.69337	-0.270469	0.0523371	0.0716432	0.52468
	CK+Ca	-0.156986	-0.0266338	0.664098	1.32653	0.133957	0.268788	1.3251	1.12279	-0.419624	0.328516
	D+Ca	1.14517	1.49815	0.276127	0.431858	-0.694142	-0.573415	0.243343	0.450708	0.945007	1.14862
Qingshu 9	CK	-1.54507	-1.82442	0.756241	-0.324486	0.718498	0.878041	-0.084677	-0.535735	-0.747136	0.245796
	D	0.288083	-0.286314	-0.916886	-1.90411	-0.0608896	0.582374	-1.41854	-1.25118	0.0716432	-1.64258
	CK+Ca	-0.597648	-0.399508	0.768366	-0.294366	0.572363	0.636132	0.429704	0.186483	-0.446917	0.926462
	D+Ca	0.649426	0.34624	0.0821409	0.231058	0.718498	0.439021	-0.239097	-0.720016	1.54545	-0.829562
