# Supplementary material for: Foliar Application of Chelated Sugar Alcohol Calcium Improves Photosynthesis and Tuber Quality under Drought Stress in Potatoes (Solanum tuberosum L.)
Source: Int J Mol Sci. 2023 Jul 30;24(15):12216. doi: 10.3390/ijms241512216 (PMC10418820; doi:10.3390/ijms241512216)
Supplement: Supplementary file 1 [file ijms-24-12216-s001.zip › Table S4.xlsx]

## Sheet: Table S4
Table S4: Eigenvalues and cumulative contribution rates of ten variances
	Eigenvalues	Explain the percentage of variance (%)	Cumulative variance contibution rate (%)
1	3.35662	33.5662	33.5662
2	2.76766	27.6766	61.2428
3	1.25203	12.5203	73.7631
4	0.863365	8.63365	82.3967
5	0.753724	7.53724	89.934
6	0.424488	4.24488	94.1789
7	0.245134	2.45134	96.6302
8	0.148058	1.48058	98.1108
9	0.118025	1.18025	99.291
10	0.0708975	0.708975	100
