# Supplementary material for: Foliar Application of Chelated Sugar Alcohol Calcium Improves Photosynthesis and Tuber Quality under Drought Stress in Potatoes (Solanum tuberosum L.)
Source: Int J Mol Sci. 2023 Jul 30;24(15):12216. doi: 10.3390/ijms241512216 (PMC10418820; doi:10.3390/ijms241512216)
Supplement: Supplementary file 1 [file ijms-24-12216-s001.zip › Table S5.xlsx]

## Sheet: Table S5
Table S5: Principal component load factor and eigenvector
Indicator	Principal component factor load matrix			Principal component eigenvectors
	PC1	PC2	PC3	PC1	PC2	PC3
X1 (Moisture)	-0.89728	0.097687	0.241305	-0.489752	0.0587193	0.215655
X2 (Protein)	-0.846733	0.399566	0.181107	-0.462163	0.240178	0.161856
X3 (Starch)	0.673126	0.352646	0.341485	0.367405	0.211974	0.305186
X4 (Ca)	0.172121	0.809309	0.245386	0.0939468	0.486472	0.219302
X5 (Fiber)	0.737854	-0.132449	0.465316	0.402735	-0.0796145	0.415854
X6 (Fe)	0.644312	-0.338496	0.149726	0.351678	-0.203469	0.133811
X7 (K)	0.306425	0.781119	0.152869	0.167253	0.469527	0.13662
X8 (Mg)	-0.0420374	0.781169	-0.38238	-0.0229448	0.469558	-0.341734
X9 (Reducing sugar)	-0.539928	-0.207906	0.756915	-0.294703	-0.124972	0.676457
X10 (Vc)	0.071246	0.650695	0.0522843	0.0388874	0.39113	0.0467266
