# Supplementary material for: Foliar Application of Chelated Sugar Alcohol Calcium Improves Photosynthesis and Tuber Quality under Drought Stress in Potatoes (Solanum tuberosum L.)
Source: Int J Mol Sci. 2023 Jul 30;24(15):12216. doi: 10.3390/ijms241512216 (PMC10418820; doi:10.3390/ijms241512216)
Supplement: Supplementary file 1 [file ijms-24-12216-s001.zip › Table S6.xlsx]

## Sheet: Table S6
Table S6: Comprehensive evaluation of the effects of foliar application of Ca2+ on the quality of potato tubers under drought stress
Cultivar	Treatment	F1	F2	F3	F
Atl	CK	0.555558	0.753624	-0.938258	0.376319
	D	-2.66167	0.183706	-1.09924	-1.32886
	CK+Ca	0.938589	2.03544	0.0759234	1.20371
	D+Ca	-1.7959	1.52467	0.875184	-0.0966116
QS9	CK	2.67327	-0.864124	-0.374989	0.828605
	D	-0.637769	-3.19111	-0.423523	-1.55944
	CK+Ca	1.42153	0.421166	0.035481	0.810923
	D+Ca	-0.493609	-0.863376	1.84942	-0.234651
