# Supplementary material for: Foliar Application of Chelated Sugar Alcohol Calcium Improves Photosynthesis and Tuber Quality under Drought Stress in Potatoes (Solanum tuberosum L.)
Source: Int J Mol Sci. 2023 Jul 30;24(15):12216. doi: 10.3390/ijms241512216 (PMC10418820; doi:10.3390/ijms241512216)
Supplement: Supplementary file 1 [file ijms-24-12216-s001.zip › Table S7.xlsx]

## Sheet: Table S7
Table S7: The primers used for real-time PCR
Gene	Accession number	Forward primer sequences (5'-3')	Reverse primer sequences (5'-3')
StCDPK3	XM_006366477.2	AGAACAACAGCAAACCCAACC	TATTTTGCCTTGTTGGCTCTTT
StCDPK20	NM_001318643.1	GGAAACCTAATCAGTCGGAGA	TGGAGGTGGATTACCTTGAATAC
StCDPK21	XM_006351851.2	TCAAGATAAGCCACCAGAACAGA	CTAAGTCCAGCACTAGACACCCT
StCDPK23	XM_015310592.1	ACAAGGAGATGTGTTTAAGGACATAG	AAATCAATATGTCCACGCAAAA
StSOD	XM_006358693.2	TAGACGTTTGGGAACACGCA	CTCTTCAGGGGCACTCGTTT
StPOD	XM_006350817.2	AGGACTTCTGGTCTGGTGGT	TGGCTGTCATAGTCCCCACT
StCAT	NM_001287934.1	CAAACAATGGACCCCGAGGA	ACTGGGATCAACGGCAAGAG
StP5CS	XM_006355200.2	GCCCAGTTGGAGTTGAAGGA	CCCACCATCCAATAGCACCA
Actin	XM_015308091.1	AGGAGCATCCTGTCCTCCTAA	CACCATCACCAGAGTCCAACA
